# Supplementary material for: Crosstalk between the Arabidopsis Glutathione Peroxidase-Like 5 Isoenzyme (AtGPXL5) and Ethylene
Source: MDPI journal article supplement (doi:10.3390/ijms23105749), 2022-05-20
Supplement: s1 [file s1]

## Crosstalk between the *Arabidopsis* Glutathione Peroxidase-Like 5 Isoenzyme (AtGPXL5) and Ethylene

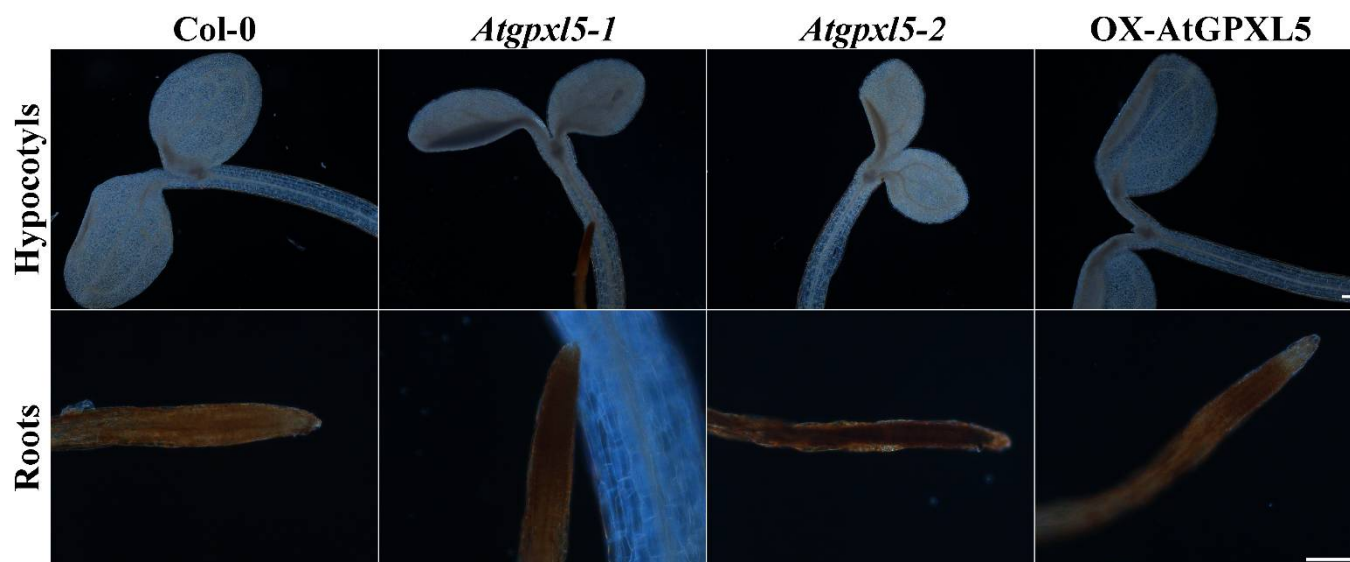

**Figure S1.** Histochemical assay of 4-day-old light-grown seedlings using DAB (3,3'-diaminobenzidine) staining to visualize the H<sub>2</sub>O<sub>2</sub> content in the investigated genotypes (scalebar = 100  $\mu$ m).

**Table S1.** The mean  $2^{(-\Delta\Delta C_t)}$  data of RT-qPCR analysis.

| Genes | Shoot   |                      |                       |                      |                      |                      | Root    |         |            |               |         |            |
|-------|---------|----------------------|-----------------------|----------------------|----------------------|----------------------|---------|---------|------------|---------------|---------|------------|
|       | Control |                      |                       | 1 $\mu$ M ACC        |                      |                      | Control |         |            | 1 $\mu$ M ACC |         |            |
|       | Col-0   | Atgpxl5              | OX-AtGPXL5            | Col-0                | Atgpxl5              | OX-AtGPXL5           | Col-0   | Atgpxl5 | OX-AtGPXL5 | Col-0         | Atgpxl5 | OX-AtGPXL5 |
| ACS2  | 1       | $2.5 \times 10^{-8}$ | $6.7 \times 10^{-10}$ | $7.1 \times 10^{-8}$ | $1.8 \times 10^{-8}$ | $1.1 \times 10^{-8}$ | 1       | 332.57  | 69.31      | 2.61          | 4.26    | 2.17       |
| ACS6  | 1       | 3.57                 | 2.13                  | 2.69                 | 1.42                 | 1.66                 | 1       | 54.66   | 25.28      | 44.63         | 21.30   | 36.32      |
| ACO1  | 1       | 0.70                 | 0.58                  | 1.53                 | 0.84                 | 0.18                 | 1       | 1.17    | 1.67       | 5.54          | 6.83    | 2.16       |
| ACO2  | 1       | 0.14                 | 0.59                  | 0.76                 | 1.53                 | 1.19                 | 1       | 0.31    | 0.33       | 2.35          | 2.29    | 2.77       |
| ACO3  | 1       | 0.90                 | 0.34                  | 0.97                 | 0.69                 | 1.40                 | 1       | 0.12    | 0.08       | 0.19          | 0.20    | 0.36       |
| ACO4  | 1       | 1.81                 | 0.63                  | 1.44                 | 3.38                 | 1.91                 | 1       | 2.86    | 1.95       | 5.17          | 4.26    | 5.44       |
| ACO5  | 1       | 1.22                 | 0.40                  | 1.06                 | 0.68                 | 0.44                 | 1       | 2.54    | 2.68       | 0.24          | 0.27    | 1.75       |
| ETR1  | 1       | 3.05                 | 1.17                  | 2.54                 | 2.51                 | 2.36                 | 1       | 1.64    | 1.83       | 2.18          | 2.26    | 1.26       |
| ETR2  | 1       | 0.55                 | 0.89                  | 0.24                 | 0.93                 | 0.49                 | 1       | 0.36    | 2.81       | 1.20          | 1.99    | 2.34       |
| ERS1  | 1       | 2.19                 | 0.43                  | 0.82                 | 3.19                 | 2.25                 | 1       | 2.22    | 1.84       | 1.72          | 2.02    | 3.12       |
| ERS2  | 1       | 0.96                 | 0.26                  | 0.11                 | 1.49                 | 2.70                 | 1       | 1.94    | 1.40       | 2.85          | 3.45    | 8.53       |
| EIN4  | 1       | 4.80                 | 0.85                  | 3.64                 | 8.31                 | 3.84                 | 1       | 1.46    | 1.25       | 1.24          | 1.10    | 1.19       |
| CTR1  | 1       | 1.05                 | 0.24                  | 0.87                 | 0.80                 | $5.5 \times 10^{-4}$ | 1       | 1.73    | 1.57       | 1.38          | 1.33    | 1.90       |
| ERF1  | 1       | 17.60                | 4.05                  | 5.47                 | 24.34                | 20.04                | 1       | 37.60   | 43.56      | 32.22         | 54.10   | 78.11      |

**Table S2.** Responsiveness of the growth *Arabidopsis thaliana* wild type (Col-0) and glutathione peroxidase-like 5 mutants (*Atgpxl5-1* and *Atgpxl5-2*) and overexpressing line (OX-AtGPXL5) seedlings to 1  $\mu$ M ACC (1-aminocyclopropane-1-carboxylic acid) treatment. The dark-grown seedlings were germinated and kept for 4 days in the presence of 1  $\mu$ M ACC. The decrease of the hypocotyl and primary root length compared to untreated controls are calculated from data presented in Figure 3a.

|                  | Control                               | 1 $\mu$ M ACC Treatment               | Changes in Hypocotyl Length<br>due to ACC Treatment<br>(% of Control) | Changes in Primary Root Length<br>due to ACC Treatment<br>(% of Control) |
|------------------|---------------------------------------|---------------------------------------|-----------------------------------------------------------------------|--------------------------------------------------------------------------|
|                  | Ratio of Hypocotyl and<br>Root Length | Ratio of Hypocotyl and<br>Root Length |                                                                       |                                                                          |
| Col-0            | 1.48 $\pm$ 0.20 ns                    | 1.04 $\pm$ 0.13 b                     | 32.46 $\pm$ 5.70 b                                                    | 46.22 $\pm$ 5.77 b                                                       |
| <i>Atgpxl5-1</i> | 1.78 $\pm$ 0.71 ns                    | 1.62 $\pm$ 0.24 a                     | 41.50 $\pm$ 7.38 a                                                    | 45.71 $\pm$ 6.31 b                                                       |
| <i>Atgpxl5-2</i> | 1.76 $\pm$ 0.67 ns                    | 1.64 $\pm$ 0.30 a                     | 39.57 $\pm$ 8.94 a                                                    | 42.51 $\pm$ 7.01 b                                                       |
| OX-<br>AtGPXL5   | 1.51 $\pm$ 0.15 ns                    | 1.01 $\pm$ 0.06 b                     | 40.20 $\pm$ 4.73 a                                                    | 59.87 $\pm$ 3.37 a                                                       |

**Table S3.** Primers pairs used for the quantitative real time PCR (RT-qPCR) analysis and the size of PCR products.

| Genes                      | Forward Primers          | Reverse Primers          | Product Sizes | References |
|----------------------------|--------------------------|--------------------------|---------------|------------|
| <i>ACS2</i> (AT1G01480)    | GGTGGTTATGAGCGGAGGA      | TACGGGGAGGGAATGAGGA      | 93 bp         | [1]        |
| <i>ACS6</i> (AT4G11280)    | AGGCACGCTGAGATAACCAC     | AATCCATCCACAAGAACAACC    | 85 bp         | [1]        |
| <i>ACO1</i> (AT2G19590)    | TCAGATGCAGATTGGGAAAGC    | TCTCACACATGAGCTTGGAGAGTC | 160 bp        | [2]        |
| <i>ACO2</i> (AT1G62380)    | TCACCTCCCTCAATCCAATC     | ATCCAACAAATCCTCAGCAAGA   | 112 bp        | [1]        |
| <i>ACO3</i> (AT1G12010)    | GACCCAGAAAGAAGGAAACAGG   | AATGTCTCAACCACAGCCACC    | 240 bp        | [3]        |
| <i>ACO4</i> (AT1G05010)    | CTTGTAAGAACTGGGGCTTC     | TGTTCTTGGTCATCTTCTCC     | 88 bp         | [1]        |
| <i>ACO5</i> (AT1G77330)    | TGGATCGATGTTTCAGCCTCTACC | TGCCACGCACTCTGTACCTTC    | 95 bp         | [4]        |
| <i>ETR1</i> (AT1G66340)    | GTGTGTGTATGTGTGAGAGAGG   | GCAATGAAGAAATCGGAGATG    | 131 bp        | [1]        |
| <i>ETR2</i> (AT3G23150)    | TCGTCCTCGCCTTCTACTTC     | TCCCACATTTCTTCATCCAAG    | 149 bp        | [1]        |
| <i>ERS1</i> (AT2G40940)    | AACCACGAGATGAGGACACC     | GCCACAAGATTGCTGCTTT      | 125 bp        | [1]        |
| <i>ERS2</i> (AT1G04310)    | GTTCTGTGCTTGCCTCAGTG     | ATGTGAATCGCCTCTGGTGT     | 115 bp        | [1]        |
| <i> EIN4</i> (AT3G04580)   | TGACTTTGATTCCGTGCTG      | TCATTTCTTCTGCTCTTCA      | 111 bp        | [1]        |
| <i>CTR1</i> (AT5G03730)    | CAGAAAATGGTGGTGGGTCT     | TGTTTGAAGTGGCTGACTG      | 126 bp        | [1]        |
| <i>ERF1</i> (AT3G23240.1)  | TCCCTTCAACGAGAACGACTC    | ACGGATTTGATCGGAAGGTC     | 111 bp        | [2]        |
| <i>Actin2</i> (At3g18780)  | GGTAACATTGTGCTCAGTGGTGG  | AACGACCTTAATCTTCATGCTGC  | 108 bp        | [5]        |
| <i>AtGPXL5</i> (At3G63080) | TCATCATCATCATCTGTGTCGGA  | GGACTCCGTGAATCCGCATT     | 144 bp        | [6]        |
| <i>GAPDH</i> (At1G16300)   | GAATCAACGGTTTCGGAAGA     | CTCGGTGGTGATGAAAGGA      | 104 bp        | [6]        |

## References

- Feigl, G.; Horváth, E.; Molnár, Á.; Oláh, D.; Poór, P.; Kolbert, Z. Ethylene-Nitric Oxide Interplay during Selenium-Induced Lateral Root Emergence in *Arabidopsis*. *J. Plant Growth Regul.* **2019**, *38*, 1481–1488.
- Asensi-Fabado, M.A.; Cela, J.; Müller, M.; Arrom, L.; Chang, C.; Munné-Bosch, S. Enhanced Oxidative Stress in the Ethylene-Insensitive (*Ein3-1*) Mutant of *Arabidopsis thaliana* Exposed to Salt Stress. *J. Plant Physiol.* **2012**, *169*, 360–368.
- Lv, B.; Tian, H.; Zhang, F.; Liu, J.; Lu, S.; Bai, M.; Li, C.; Ding, Z. Brassinosteroids Regulate Root Growth by Controlling Reactive Oxygen Species Homeostasis and Dual Effect on Ethylene Synthesis in *Arabidopsis*. *PLoS Genet.* **2018**, *14*, e1007144.
- Rauf, M.; Arif, M.; Fisahn, J.; Xue, G.-P.; Balazadeh, S.; Mueller-Roeber, B. NAC Transcription Factor Speedy Hyponastic Growth Regulates Flooding-Induced Leaf Movement in *Arabidopsis*. *Plant Cell* **2013**, *25*, 4941–4955.
- Papdi, C.; Abrahám, E.; Joseph, M.P.; Popescu, C.; Koncz, C.; Szabados, L. Functional Identification of *Arabidopsis* Stress Regulatory Genes Using the Controlled cDNA Overexpression System. *Plant Physiol.* **2008**, *147*, 528–542.
- Riyazuddin, R.; Bela, K.; Horváth, E.; Rigó, G.; Gallé, Á.; Szabados, L.; Fehér, A.; Csiszár, J. Overexpression of the *Arabidopsis* Glutathione Peroxidase-like 5 Gene (*AtGPXL5*) Resulted in Altered Plant Development and Redox Status. *Environ. Exp. Bot.* **2019**, *167*, 103849.
